# Supplementary material for: Survivorship care plan experiences among childhood acute lymphoblastic leukemia patients and their families
Source: Springer Nature journal article supplement (doi:10.1186/s12887-019-1464-0), 2019-04-13
Supplement: MOESM1 [file 16654300]

This is your Survivor Care Plan. It has information about your cancer and treatment. It also has recommendations for your follow-up care. This plan was made specifically for you based on your cancer treatment. Please share this summary with your doctors and also keep a copy for yourself.

|                      |                          |             |
|----------------------|--------------------------|-------------|
| <b>Name:</b>         | <b>Sex:</b>              | <b>DOB:</b> |
| <b>Date Created:</b> | <b>Cancer Diagnosis:</b> |             |
| <b>Date Updated:</b> | <b>Completed by:</b>     |             |

| 1. RECOMMENDED MEDICAL FOLLOW-UP |                             |                |                |                 |
|----------------------------------|-----------------------------|----------------|----------------|-----------------|
| System                           | Recommended Tests/Screening | How Often Done | Date Last Done | Reason/Exposure |
| Heart                            |                             |                |                |                 |
| Hormones                         |                             |                |                |                 |
| Muscles/Bones                    |                             |                |                |                 |
| Nerve/Brain Function             |                             |                |                |                 |
| Eye/Vision/Hearing               |                             |                |                |                 |
| Lung                             |                             |                |                |                 |
| Fertility/Urination              |                             |                |                |                 |
| Second Cancer                    |                             |                |                |                 |
| Other: _____                     |                             |                |                |                 |

| 2. RECOMMENDED PSYCHOSOCIAL FOLLOW-UP                                                                                                                                                                                                                                                                                                                                                                                                                                          |                                                                                       |                                 |
|--------------------------------------------------------------------------------------------------------------------------------------------------------------------------------------------------------------------------------------------------------------------------------------------------------------------------------------------------------------------------------------------------------------------------------------------------------------------------------|---------------------------------------------------------------------------------------|---------------------------------|
| <p>If your child is having difficulty with any of the following:</p> <ul style="list-style-type: none"> <li>• School or work performance</li> <li>• Relationships or social interactions</li> <li>• Emotions (such as worries, depressed or sad mood) or behavior changes</li> </ul> <p>Please call Hematology/Oncology at [INSERT HOSPITAL/SOCIAL WORK PHONE LINE] and ask for a social worker, who can provide assistance or referrals to the appropriate professionals.</p> |                                                                                       |                                 |
| Additional Resources:                                                                                                                                                                                                                                                                                                                                                                                                                                                          | QR Code                                                                               | Guideline Applicable to Patient |
| Education:<br><a href="http://www.survivorshipguidelines.org/pdf/healthlinks/English/educational_issues_Eng.pdf">http://www.survivorshipguidelines.org/pdf/healthlinks/English/educational_issues_Eng.pdf</a>                                                                                                                                                                                                                                                                  |  | <input type="checkbox"/>        |
| Emotional Needs:<br><a href="http://www.survivorshipguidelines.org/pdf/healthlinks/English/emotional_issues_Eng.pdf">http://www.survivorshipguidelines.org/pdf/healthlinks/English/emotional_issues_Eng.pdf</a>                                                                                                                                                                                                                                                                |  | <input type="checkbox"/>        |
| Recommendations are given by the Children's Oncology Group and taken from their website <a href="http://www.survivorshipguidelines.org/">http://www.survivorshipguidelines.org/</a>                                                                                                                                                                                                                                                                                            |                                                                                       |                                 |

### 3. VACCINATIONS

| Vaccination                          | Abbreviation or Common Name | Vaccination Completed                                 | Date Vaccination Completed | Vaccination Follow-Up Dates if Needed |
|--------------------------------------|-----------------------------|-------------------------------------------------------|----------------------------|---------------------------------------|
| Tetanus, Diphtheria, Pertussis       | DtaP                        | <input type="checkbox"/> Y <input type="checkbox"/> N |                            |                                       |
| <i>Haemophilus influenzae</i> type b | HiB                         | <input type="checkbox"/> Y <input type="checkbox"/> N |                            |                                       |
| Polio                                | IPV                         | <input type="checkbox"/> Y <input type="checkbox"/> N |                            |                                       |
| Hepatitis B                          | HepB                        | <input type="checkbox"/> Y <input type="checkbox"/> N |                            |                                       |
| Hepatitis A                          | HepA                        | <input type="checkbox"/> Y <input type="checkbox"/> N |                            |                                       |
| Pneumococcal Vaccine                 | PCV13, PPSV23               | <input type="checkbox"/> Y <input type="checkbox"/> N |                            |                                       |
| Measles, Mumps, Rubella              | MMR                         | <input type="checkbox"/> Y <input type="checkbox"/> N |                            |                                       |
| Chickenpox                           | Varicella                   | <input type="checkbox"/> Y <input type="checkbox"/> N |                            |                                       |
| Influenza                            | Flu                         | <input type="checkbox"/> Y <input type="checkbox"/> N |                            |                                       |
| Human Papillomavirus (HPV)           | Gardasil                    | <input type="checkbox"/> Y <input type="checkbox"/> N |                            |                                       |
| Meningitis                           | MCV                         | <input type="checkbox"/> Y <input type="checkbox"/> N |                            |                                       |

### 4. PROVIDER CONTACT INFORMATION (see other providers under section 8)

| Provider Type         | Name | Contact Information |
|-----------------------|------|---------------------|
| Primary Care Provider |      |                     |
| Oncologist            |      |                     |

### 5. PROBLEMS OR CONCERNS

If your child develops a rash from low platelets or develops a prolonged fever (3-4 days) without any other signs of sickness you should contact your oncologist. For all other medical issues or questions, you should contact your pediatrician or primary care provider.

### 6. PREVENTIVE HEALTH BEHAVIORS

| Type of Behavior           | Recommendation                                                                                                                                                                                                  | QR Code                                                                               | Guideline Applicable to Patient |
|----------------------------|-----------------------------------------------------------------------------------------------------------------------------------------------------------------------------------------------------------------|---------------------------------------------------------------------------------------|---------------------------------|
| Diet and Physical Activity | <a href="http://www.survivorshipguidelines.org/pdf/healthlinks/English/diet_and_physical_activity_Eng.pdf">http://www.survivorshipguidelines.org/pdf/healthlinks/English/diet_and_physical_activity_Eng.pdf</a> |  | <input type="checkbox"/>        |
| Sun Protection             | <a href="http://www.survivorshipguidelines.org/pdf/healthlinks/English/skin_health_Eng.pdf">http://www.survivorshipguidelines.org/pdf/healthlinks/English/skin_health_Eng.pdf</a>                               |  | <input type="checkbox"/>        |

NOTE: These recommendations are based upon the current age of the patient. These recommendations will change over time. As the patient ages, they should refer to their primary care provider to receive instruction on more up to date recommendations.

Recommendations are given by the Children's Oncology Group and taken from their website <http://www.survivorshipguidelines.org/>

| 7. EDUCATION ON OTHER POTENTIAL HEALTH ISSUES                                                                                                                                       |                                                                                                                                                                                                                                                                                                                                                                                                            |                                                                                                                                                                                           |                                                         |
|-------------------------------------------------------------------------------------------------------------------------------------------------------------------------------------|------------------------------------------------------------------------------------------------------------------------------------------------------------------------------------------------------------------------------------------------------------------------------------------------------------------------------------------------------------------------------------------------------------|-------------------------------------------------------------------------------------------------------------------------------------------------------------------------------------------|---------------------------------------------------------|
| Potential Health Issues                                                                                                                                                             | Recommendation                                                                                                                                                                                                                                                                                                                                                                                             | QR Code                                                                                                                                                                                   | Guideline Applicable to Patient                         |
| Dental Issues                                                                                                                                                                       | <a href="http://www.survivorshipguidelines.org/pdf/healthlinks/English/dental_health_Eng.pdf">http://www.survivorshipguidelines.org/pdf/healthlinks/English/dental_health_Eng.pdf</a>                                                                                                                                                                                                                      |                                                                                                        | <input type="checkbox"/> Y <input type="checkbox"/> N/A |
| Fertility Issues                                                                                                                                                                    | <a href="http://www.survivorshipguidelines.org/pdf/healthlinks/English/female_health_issues_Eng.pdf">http://www.survivorshipguidelines.org/pdf/healthlinks/English/female_health_issues_Eng.pdf</a><br><a href="http://www.survivorshipguidelines.org/pdf/healthlinks/English/male%20health_issues_Eng.pdf">http://www.survivorshipguidelines.org/pdf/healthlinks/English/male%20health_issues_Eng.pdf</a> |  <br>(Female) (Male) | <input type="checkbox"/> Y <input type="checkbox"/> N/A |
| Health Care                                                                                                                                                                         | <a href="http://www.survivorshipguidelines.org/pdf/healthlinks/English/finding_and_paying_for_healthcare_Eng.pdf">http://www.survivorshipguidelines.org/pdf/healthlinks/English/finding_and_paying_for_healthcare_Eng.pdf</a>                                                                                                                                                                              |                                                                                                        | <input type="checkbox"/> Y <input type="checkbox"/> N/A |
| Heart Health                                                                                                                                                                        | <a href="http://www.survivorshipguidelines.org/pdf/healthlinks/English/heart_health_Eng.pdf">http://www.survivorshipguidelines.org/pdf/healthlinks/English/heart_health_Eng.pdf</a>                                                                                                                                                                                                                        |                                                                                                        | <input type="checkbox"/> Y <input type="checkbox"/> N/A |
| Secondary Cancer Risk                                                                                                                                                               | <a href="http://www.survivorshipguidelines.org/pdf/healthlinks/English/reducing_the_risk_of_second_cancers_Eng.pdf">http://www.survivorshipguidelines.org/pdf/healthlinks/English/reducing_the_risk_of_second_cancers_Eng.pdf</a>                                                                                                                                                                          |                                                                                                        | <input type="checkbox"/> Y <input type="checkbox"/> N/A |
| Other: _____                                                                                                                                                                        |                                                                                                                                                                                                                                                                                                                                                                                                            |                                                                                                                                                                                           | <input type="checkbox"/> Y <input type="checkbox"/> N/A |
| NOTE: If marked N/A recommendation not applicable.                                                                                                                                  |                                                                                                                                                                                                                                                                                                                                                                                                            |                                                                                                                                                                                           |                                                         |
| Recommendations are given by the Children's Oncology Group and taken from their website <a href="http://www.survivorshipguidelines.org/">http://www.survivorshipguidelines.org/</a> |                                                                                                                                                                                                                                                                                                                                                                                                            |                                                                                                                                                                                           |                                                         |

| 8. ONCOLOGY PROVIDER TEAM (see section 4 for oncology provider and primary care physician) |               |                     |
|--------------------------------------------------------------------------------------------|---------------|---------------------|
| Provider Type                                                                              | Provider Name | Contact Information |
| Nurse Coordinator                                                                          |               |                     |
| Social Worker                                                                              |               |                     |
| Radiation Oncologist                                                                       |               |                     |
| Surgeon(s)                                                                                 |               |                     |
| Genetic Counselor                                                                          |               |                     |
| Other: _____                                                                               |               |                     |



| 12. SURGERY |           |                      |                        |                     |
|-------------|-----------|----------------------|------------------------|---------------------|
| Date        | Procedure | Site (if applicable) | Side (right/left/both) | Surgeon/Institution |
|             |           |                      |                        |                     |
|             |           |                      |                        |                     |
|             |           |                      |                        |                     |

| 13. ALLERGIES / ADVERSE DRUG REACTIONS |          |      |
|----------------------------------------|----------|------|
| Drug/Product                           | Reaction | Date |
|                                        |          |      |
|                                        |          |      |
|                                        |          |      |

| 14. RADIATION |            |            |           |           |                         |                    |            |                  |                                    |      |
|---------------|------------|------------|-----------|-----------|-------------------------|--------------------|------------|------------------|------------------------------------|------|
| Site/Field    | Laterality | Start Date | Stop Date | Fractions | Dose per Fraction (Gy)* | Initial Dose (Gy)* | Boost Site | Boost Dose (Gy)* | Total Dose (including boost) (Gy)* | Type |
|               |            |            |           |           |                         |                    |            |                  |                                    |      |
|               |            |            |           |           |                         |                    |            |                  |                                    |      |

Radiation Treatment Center:

| 15. PAST COMPLICATIONS/TOXICITIES |            |               |
|-----------------------------------|------------|---------------|
| Problem                           | Date Onset | Date Resolved |
|                                   |            |               |
|                                   |            |               |

| 16. CURRENT OR ONGOING PROBLEMS |            |               |
|---------------------------------|------------|---------------|
| Problem                         | Date Onset | Date Resolved |
|                                 |            |               |
|                                 |            |               |

**NOTES**
